# Supplementary material for: Design and synthesis of a 3D flexible film electrode based on a sodium carboxymethyl cellulose–polypyrrole@reduced graphene oxide composite for supercapacitors
Source: Royal Society of Chemistry journal article supplement (doi:10.1039/d1nj00204j), 2021-01-01
Supplement: d1nj00204j1.pdf [file d1nj00204j1.pdf]

## Supporting Information

### Design and synthesis of 3D flexible film electrode based on sodium carboxymethyl cellulose-polypyrrole@reduced graphene oxide composite for supercapacitor

Hanping Xu, Yue Li, Mengying Jia, Linlin Cui, Chen Cheng, Yupeng Yang, Xiaojuan Jin\*

MOE Engineering Research Center of Forestry Biomass Materials and Bioenergy, Beijing Key  
Laboratory of Lignocellulosic Chemistry, Beijing Forestry University, Beijing 100083, China.

\*Corresponding author      Tel: +86 13718160441      E-mail: jxj0322@bjfu.edu.cn

*Synthesis of GO.* Firstly, 70 ml 98% H<sub>2</sub>SO<sub>4</sub> was added in a 500 ml beaker. Meanwhile, 3 g of flake graphite and 1.5 g of sodium nitrate were added in the beaker and the resulting mixture was stirred for 15 mins under ice bath. Then 9 g of potassium permanganate and 3 g of potassium ferrate were slowly added into the above solution, and continue to stir in the ice bath for 90 mins. After the reaction is completed, transfer to a 30-40 °C water bath and stirred for 3 h. Then 150 mL of deionized water was slowly added to the solution, and transfer the beaker to an oil bath at 90 °C for 20 mins. After completion, take out the beaker and added 500 mL of deionized water to stir evenly. And quickly added 15 ml of 30% hydrogen peroxide, result in the color of the solution was changed from dark brown to bright yellow. Finally, it was washed once with 250 ml of hydrochloric acid having a solubility of 1:10, and the washed with deionized water until the PH of the solution reached neutral. And the obtained solid dissolve in 500 ml of deionized water, and centrifuge for 0.5 h at a speed of 4000 rpm. The obtained solution was the GO dispersions.

*Synthesis of CMC-PPy.* Firstly, 100 mg CMC was dispersed in a mixture of 10 ml HCl (1 M) and 1 ml pyrrole monomer, and deionized water was added until to obtained 40 ml mixture, followed by ultrasound for 30 mins. Then, 1.28 g  $(\text{NH}_4)_2\text{S}_2\text{O}_8$  was dissolved in 10 ml deionized water, added to the reaction mixture and stirred for 12 h under ice bath for oxidative polymerization. After the completion, it was filtered and washed with deionized water several times, then placed in a 70 °C oven to dry overnight, and finally the CMC-PPy composite was obtained. PPy was synthesized under the same conditions, except that CMC was not added.

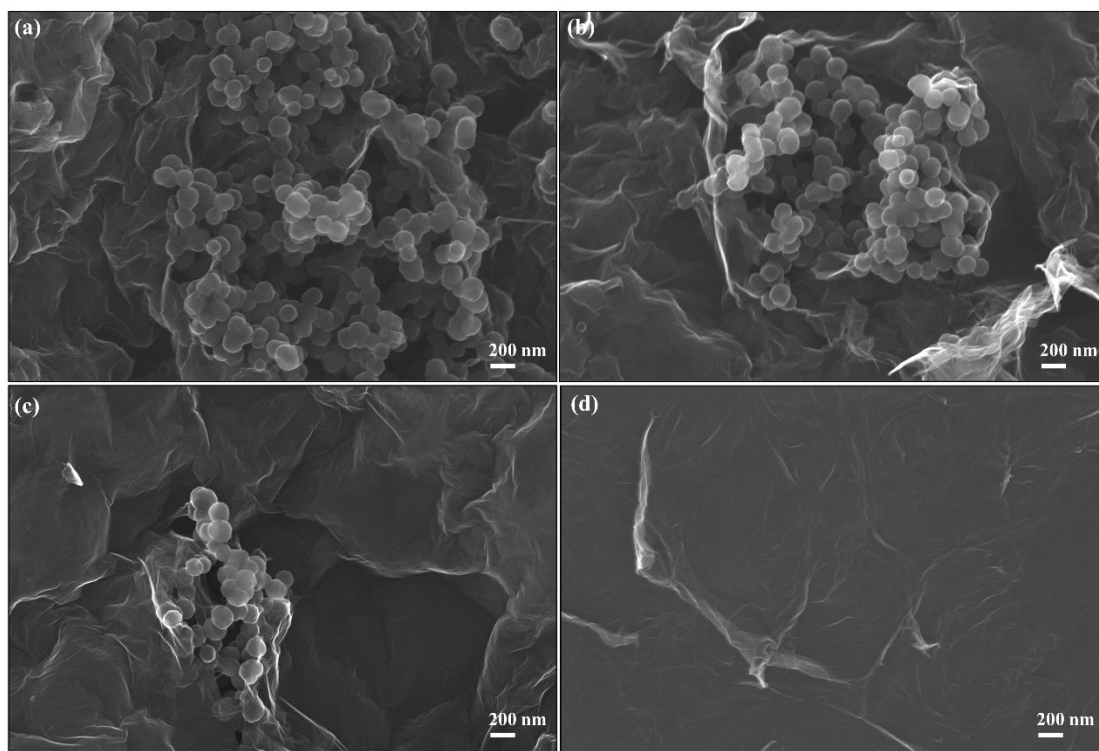

Fig. S1 SEM image of (a) S-CPR<sub>2:3</sub>, (b) S-CPR<sub>1:3</sub>, (c) S-CPR<sub>1:6</sub> and (d) S-R film.

Table S1

Electrochemical performance comparison between some literature reports and this work

| Electrode material | Electrolyte | Specific | Current density | Cyclic stability | Ref. |
|--------------------|-------------|----------|-----------------|------------------|------|
|--------------------|-------------|----------|-----------------|------------------|------|

|                                              |                                                       | capacitance                                        |                          |                              |           |
|----------------------------------------------|-------------------------------------------------------|----------------------------------------------------|--------------------------|------------------------------|-----------|
| PPy/GO                                       | 1 M KCl,<br>2-electrode                               | 154.5 mF cm <sup>-2</sup>                          | 1 mA cm <sup>-2</sup>    | 107.5 % after<br>5000 cycles | 1         |
| PPy-GO/CNTs                                  | 1 M KCl,<br>2-electrode                               | 142.2 mF cm <sup>-2</sup>                          | 1 mA cm <sup>-2</sup>    | 97.3 % after<br>5000 cycles  | 2         |
| rGO/PPy                                      | 1 M KCl,<br>3-electrode                               | 419 mF cm <sup>-2</sup>                            | 0.2 mA cm <sup>-2</sup>  | 95.7 % after<br>10000 cycles | 3         |
| rGO/MnFe <sub>2</sub> O <sub>4</sub> /PPy    | 1 M H <sub>2</sub> SO <sub>4</sub> ,<br>2-electrode   | 395 mF cm <sup>-2</sup>                            | 5 mV s <sup>-1</sup>     |                              | 4         |
| PPy/CG/CNT                                   | 1 M KCl,<br>2-electrode                               | 196.7 mF cm <sup>-2</sup>                          | 0.5 mA cm <sup>-2</sup>  | 98.1 % after<br>5000 cycles  | 5         |
| PPy/FCC                                      | 5 M LiCl,<br>3-electrode                              | 341.2 mF cm <sup>-2</sup>                          | 1mA cm <sup>-2</sup>     | 96 % after<br>10000 cycles   | 6         |
| T-Fe <sub>2</sub> O <sub>3</sub> /PPy<br>NAs | 1 M Na <sub>2</sub> SO <sub>4</sub> ,<br>3-electrode  | 382.4 mF cm <sup>-2</sup>                          | 0.5 mA cm <sup>-2</sup>  | 97.2 % after<br>5000 cycles  | 7         |
| Co-BC90                                      | 3M KOH<br>3-electrode                                 | 158.5 mF cm <sup>-2</sup>                          | 0.25 mA cm <sup>-2</sup> | 99% after 3000<br>cycles     | 8         |
| Ag@PPy@MnO <sub>2</sub>                      | 0.1M Na <sub>2</sub> SO <sub>4</sub> ,<br>3-electrode | 426.3 mF cm <sup>-2</sup>                          | 1mA cm <sup>-2</sup>     | 98.7% after<br>10000 cycles  | 9         |
| g-C <sub>3</sub> N <sub>4</sub> /PPy         | 6M KOH,<br>3-electrode                                | 289.6 mF cm <sup>-2</sup>                          | 0.4 mA cm <sup>-2</sup>  | 99% after<br>10000 cycles    | 10        |
| G-PPy/GP                                     | 1 M KCl,<br>2-electrode                               | 173.0 mF cm <sup>-2</sup>                          | 0.2 mA cm <sup>-2</sup>  | 90.5% 5000<br>cycles         | 11        |
| PPy/CNTs                                     | 1 M KCl,<br>2-electrode                               | 185.3 mF cm <sup>-2</sup>                          | 0.5 mA cm <sup>-2</sup>  | 88.5% 10000<br>cycles        | 12        |
| CNK-900                                      | 1 M Na <sub>2</sub> SO <sub>4</sub><br>3-electrode    | 204 F g <sup>-1</sup>                              | 0.5 A g <sup>-1</sup>    | 92% after 1000<br>cycles     | 13        |
| S-CPR <sub>1:1</sub>                         | 1 M Na <sub>2</sub> SO <sub>4</sub><br>3-electrode    | 489 mF cm <sup>-2</sup> ,<br>191 F g <sup>-1</sup> | 0.5 mA cm <sup>-2</sup>  | 101.6 % after<br>1000 cycles | This work |

## References

1. H. Zhou, W. Zhang, Y. Chang and D. Fu, *Journal of Materials Science: Materials in Electronics*, 2018, **30**, 1109-1116.
2. H. Zhou and G. Han, *Electrochimica Acta*, 2016, **192**, 448-455.
3. J. Chen, Y. Wang, J. Cao, L. Liao, Y. Liu, Y. Zhou, J.-H. Ouyang, D. Jia, M. Wang, X. Li and Z. Li, *Electrochimica Acta*, 2020, **361** 1-12.
4. S. Ishaq, M. Moussa, F. Kanwal, M. Ehsan, M. Saleem, T. N. Van and D. Losic, *Sci Rep*, 2019, **9**, 1-11.
5. H. Zhou, H.-J. Zhai and X. Zhi, *Electrochimica Acta*, 2018, **290**, 1-11.
6. D.-Y. Feng, Y. Song, Z.-H. Huang, X.-X. Xu and X.-X. Liu, *Journal of Power Sources*, 2016, **324**, 788-797.
7. L.-B. Wang, H.-L. Yang, X.-X. Liu, R. Zeng, M. Li, Y.-H. Huang and X.-L. Hu, *Angewandte Chemie International Edition*, 2017, **56** 1105-1110.
8. L. Wannasen, E. Swatsitang and S. Pinitsoontorn, *International Journal of Energy Research*, 2020, **17** 1-14.
9. L. Liu, Q. Tian, W. Yao, M. Li, Y. Li and W. Wu, *Journal of Power Sources*, 2018, **397**, 59-67.
10. N. Duraisamy, P. S, R. R and K. Kandiah, *Progress in Natural Science: Materials International*, 2020, **30**, 298-307.
11. X. Zhi and H. Zhou, *Chemical Papers*, 2018, **72**, 2513-2522.
12. H. Zhou, *Journal of Materials Science: Materials in Electronics*, 2018, **29**, 7857-7866.
13. G. Nazir, A. Rehman and S.-J. Park, *Journal of CO2 Utilization*, 2020, **42**. 1-14
